# Supplementary material for: Two Birds with One Stone? Possible Dual-Targeting H1N1 Inhibitors from Traditional Chinese Medicine
Source: PLOS journal article supplement (doi:10.1371/journal.pcbi.1002315), 2011-12-22
Supplement: S1 (10.1371/journal.pcbi.1002315.s001) [file journal.pcbi.1002315.s001]

**Table S1.** TCM database screening results of H1 and N1.

| **Classification** | **Name** | **Dockscore** | | **DS (Sum of H1 and N1)** |
| --- | --- | --- | --- | --- |
|  |  | H1 | N1 | H1+ N1 |
| Phenylpropanoids | Lithospermic acid | 107.94 | 153.598 | 261.538 |
| Lignans | Chicoric acid | 99.583 | 148.091 | 247.674 |
|  | Kukoamine | 102.133 | 145.535 | 247.668 |
| Polyphenol | Chebulinic acid | 101.967 | 131.027 | 232.994 |
| Lignans | 2-O-Caffeoyl tartaric acid | 89.885 | 136.493 | 226.378 |
| Phenylpropanoids | Salvianolic acid A | 96.437 | 126.141 | 222.578 |
| Alkaloid | Dauricine | 108.432 | 107.428 | 215.86 |
| Phenylpropanoids | Salvianolic acid C | 88.64 | 126.544 | 215.184 |
| Saponin | Glycyrrhizic acid | 94.858 | 118.139 | 212.997 |
| Lignans | rosmarinic acid | 92.102 | 118.729 | 210.831 |
| Lignans | Cynarin | 93.52 | 112.928 | 206.448 |
| Alkaloid | Ergotamine | 91.274 | 114.445 | 205.719 |
| Terpenoids | Monotropein | 83.293 | 120.549 | 203.842 |
| Polyphenol | Digallic acid | 85.075 | 118.563 | 203.638 |
| Lignans | 5-O-Caffeoylshikimic acid | 88.198 | 112.722 | 200.92 |
| Alkaloid | Curine | 95.715 | 103.755 | 199.47 |
| Polyphenol | guavin B | 87.738 | 108.377 | 196.115 |
| Lignans | Isochlorogenic acid | 82.663 | 112.336 | 194.999 |
| Lignans | 3 4 5-Tri-O-caffeoylquinic acid | 101.834 | 93.004 | 194.838 |
|  | Shanzhiside | 82.394 | 110.667 | 193.061 |
| Lignans | 4-O-Caffeoylquinic acid | 81.585 | 111.37 | 192.955 |
| Lignans | 3-O-Feruloylquinic acid | 79.069 | 113.864 | 192.933 |
| Terpenoids | Geniposidic acid | 76.098 | 116.674 | 192.772 |
| Lignans | chlorogenic acid | 81.28 | 110.186 | 191.466 |
| Alkaloid | liensinine | 92.472 | 98.047 | 190.519 |
| Polyphenol | Cornusiin C | 82.254 | 107.893 | 190.147 |
| Lignans | 1-Caffeoylquinic acid | 80.732 | 109.206 | 189.938 |
| Polyphenol | Eugeniin | 83.735 | 106.045 | 189.78 |
| Polyphenol | Geraniin | 81.006 | 108.159 | 189.165 |
| Alkaloid | Vicine | 62.591 | 123.181 | 185.772 |
| Saponin | Elfvingic acid A | 82.397 | 103.32 | 185.717 |
| Alkaloid | Emetine | 89.946 | 95.694 | 185.64 |
| Terpenoids | Glutinic acid | 84.007 | 101.182 | 185.189 |
| Alkaloid | Berbamine | 96.667 | 88.409 | 185.076 |
| Polyphenol | Pedunculagin | 88.217 | 95.397 | 183.614 |
| Polyphenol | Amentoflavone | 86.278 | 97.181 | 183.459 |
| Phenylpropanoids | Tangshenoside I | 87.77 | 94.557 | 182.327 |
| Alkaloid | Scopolamine | 87.354 | 93.98 | 181.334 |
| Alkaloid | Rosmaricine | 79.093 | 101.29 | 180.383 |
|  | Picrocrocinic acid | 79.162 | 101.215 | 180.377 |
| Lignans | Capillartemisin B | 76.158 | 103.257 | 179.415 |
| Lignans | Capillartemisin A | 75.939 | 103.12 | 179.059 |
| Alkaloid | Heliotrine | 78.17 | 99.537 | 177.707 |
| Alkaloid | Xylopine | 79.586 | 95.606 | 175.192 |
| Alkaloid | Songbeisine | 78.648 | 95.516 | 174.164 |
| Polyphenol | Procyanidin C1 | 79.058 | 94.193 | 173.251 |
| Polyphenol | Rutin | 74.474 | 98.411 | 172.885 |
| Flavonoid | Hyperin | 70.549 | 100.997 | 171.546 |
| Alkaloid | Sceleratine | 71.751 | 99.584 | 171.335 |
| Alkaloid | Rhynchophylline | 82.604 | 88.021 | 170.625 |
|  | Galloyl-Oxypaeoniflorin | 78.317 | 91.492 | 169.809 |
| Polyphenol | Kaempferol-3-rutinoside | 74.844 | 94.803 | 169.647 |
| Polyphenol | Schaftoside | 77.568 | 91.532 | 169.1 |
| Polyphenol | Procyanidin B2 | 75.302 | 93.071 | 168.373 |
| Saponin | ursodeoxycholic acid | 76.292 | 92.025 | 168.317 |
| Polyphenol | epigallocatechin gallate | 71.072 | 96.439 | 167.511 |
| Polyphenol | Isomangiferin | 75.688 | 90.941 | 166.629 |
|  | Linoleic acid | 71.021 | 95.142 | 166.163 |
| Saponin | cholic acid | 76.652 | 89.126 | 165.778 |
| Saponin | Polygalacic acid | 66.446 | 99.306 | 165.752 |
| Saponin | taurocholic acid | 71.384 | 93.972 | 165.356 |
| Polyphenol | Sophoraflavonoloside | 67.263 | 97.97 | 165.233 |
| Quinones | Barbaloin | 72.702 | 91.992 | 164.694 |
| Phenylpropanoids | Salvianolic acid B | 15.69 | 148.757 | 164.447 |
| Polyphenol | Kushenol J | 73.304 | 90.02 | 163.324 |
| Alkaloid | Aristolochic acid I | 62.725 | 100.415 | 163.14 |
| Phenylpropanoids | Jionoside E | 65.157 | 96.882 | 162.039 |
| Phenylpropanoids | Crenatoside | 68.371 | 92.192 | 160.563 |
| Phenylpropanoids | Plantamajoside | 68.998 | 91.292 | 160.29 |
| Phenylpropanoids | Phlinoside B | 65.75 | 93.564 | 159.314 |
| Flavonoid | Hesperetin | 55.416 | 103.217 | 158.633 |
| Phenylpropanoids | Pedicularioside H | 66.442 | 92.187 | 158.629 |
| Flavonoid | Naringin | 65.143 | 92.881 | 158.024 |
| Saponin | Pachymic acid | 66.215 | 91.584 | 157.799 |
| Lignans | calceolarioside B | 67.678 | 88.24 | 155.918 |
|  | Skyrin | 65.143 | 89.957 | 155.1 |
| Phenylpropanoids | Plantainoside C | 65.017 | 89.057 | 154.074 |
| Lignans | Calceolarioside A | 63.759 | 89.138 | 152.897 |
| Polyphenol | Rhaponticin | 62.242 | 89.344 | 151.586 |
| Phenylpropanoids | Phlinoside E | 57.546 | 92.481 | 150.027 |
| Phenylpropanoids | Suspensaside | 58.548 | 91.219 | 149.767 |
