# Supplementary material for: Two Birds with One Stone? Possible Dual-Targeting H1N1 Inhibitors from Traditional Chinese Medicine
Source: PLOS journal article supplement (doi:10.1371/journal.pcbi.1002315), 2011-12-22
Supplement: S2 (10.1371/journal.pcbi.1002315.s002) [file journal.pcbi.1002315.s002]

| 1 | 2 | 3 | 4 | 5 |
| --- | --- | --- | --- | --- |
|  |  |  |  |  |
| 6 | 7 | 8 | 9 | 10 |
|  |  |  |  |  |
| 11 | 12 | 13 | 14 | 15 |
|  |  |  |  |  |
| 16 | 17 | 18 | 19 | 20 |
|  |  |  |  |  |
| 21 | 22 | 23 | 24 | 25* |
|  |  |  |  |  |
| 26* | 27* |  |  |  |
|  |  |  |  |  |

**Table S2.** Molecular structuresa of training and test set compounds for N1 CoMFA and CoMSIA modeling.

a: Adapted from Zhang *et al*. (2008)

*: test set
